# Supplementary material for: Investigation of local structure and phase recovery in an irradiated Nd2Zr2O7 pyrochlore
Source: Royal Society of Chemistry journal article supplement (doi:10.1039/d4tc02652g), 2024-01-01
Supplement: d4tc02652g1.pdf [file d4tc02652g1.pdf]

**Supplemental information:**

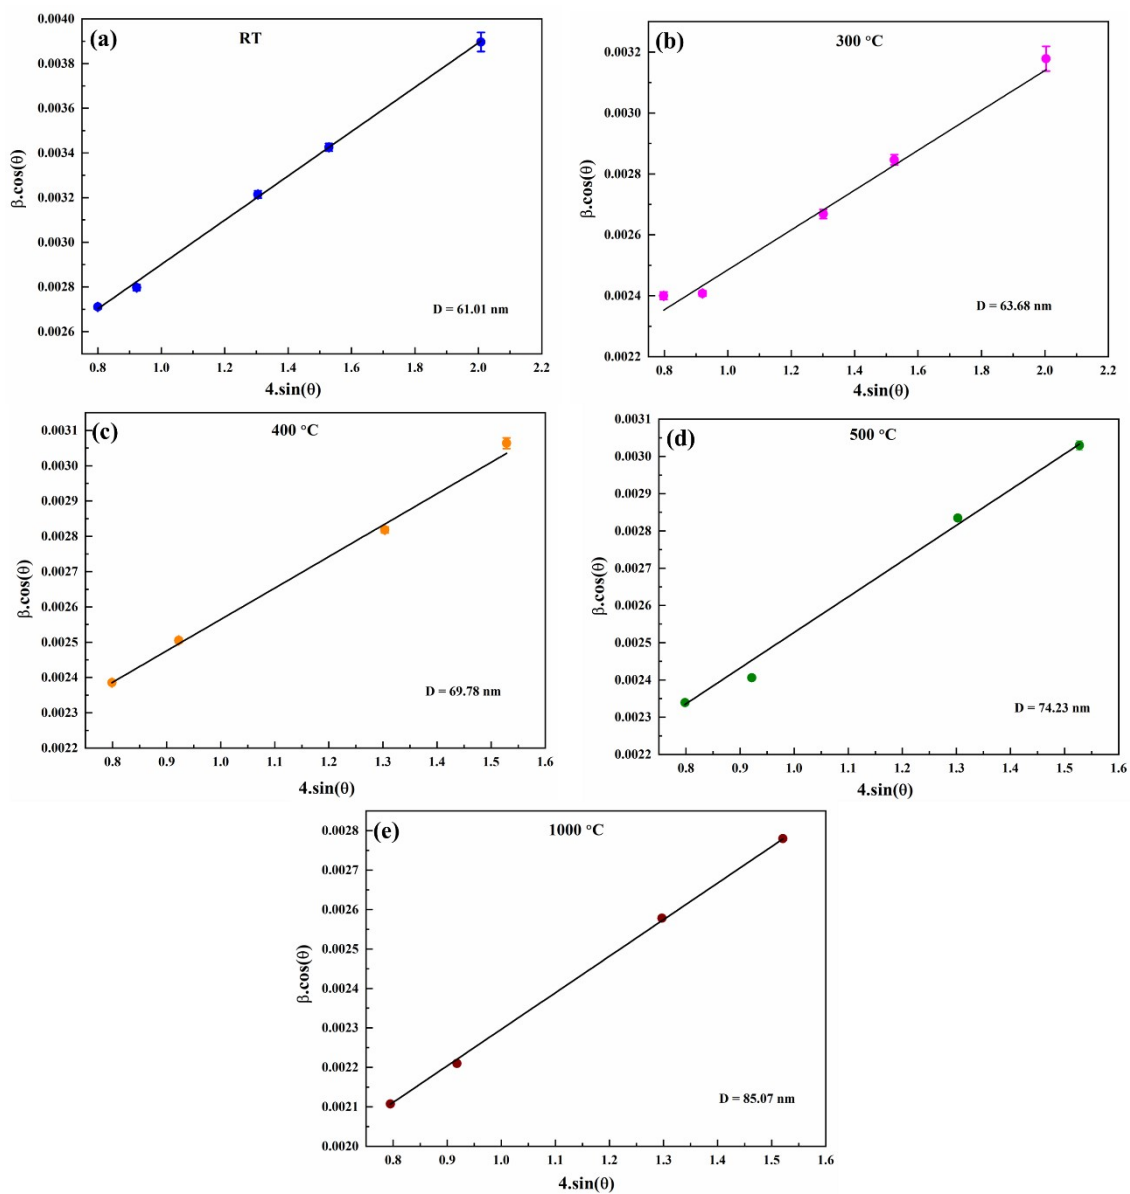

**Fig. 1.** Represents the W-H plot of irradiated  $\text{Nd}_2\text{Zr}_2\text{O}_7$  (100 MeV  $\text{I}^{7+}$  ions at the highest fluence of  $5 \times 10^{13}$  ions/cm<sup>2</sup>) composition during the thermal annealing at (a) Room temperature, (b) 300 °C, (c) 400 °C, (d) 500 °C, and (e) 1000 °C.
